# Supplementary material
Source: PubMed Central journal article supplement (PMC3930323)
Supplement: ismej2013191x1.pdf [file ismej2013191x1.pdf]

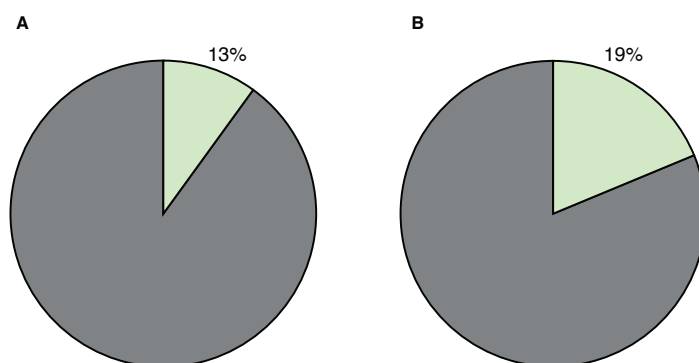

**Figure S1. Distribution of *hpnP* in cyanobacteria.** Genomes with *hpnP* are represented in green and without *hpnP* in gray. (A) Distribution of *hpnP* among all finished cyanobacterial genomes on IMG. (B) Distribution of *hpnP* among cyanobacterial genera to account for biased sequencing among genomes. If one member of a genus had *hpnP* that genus was counted as having the gene.

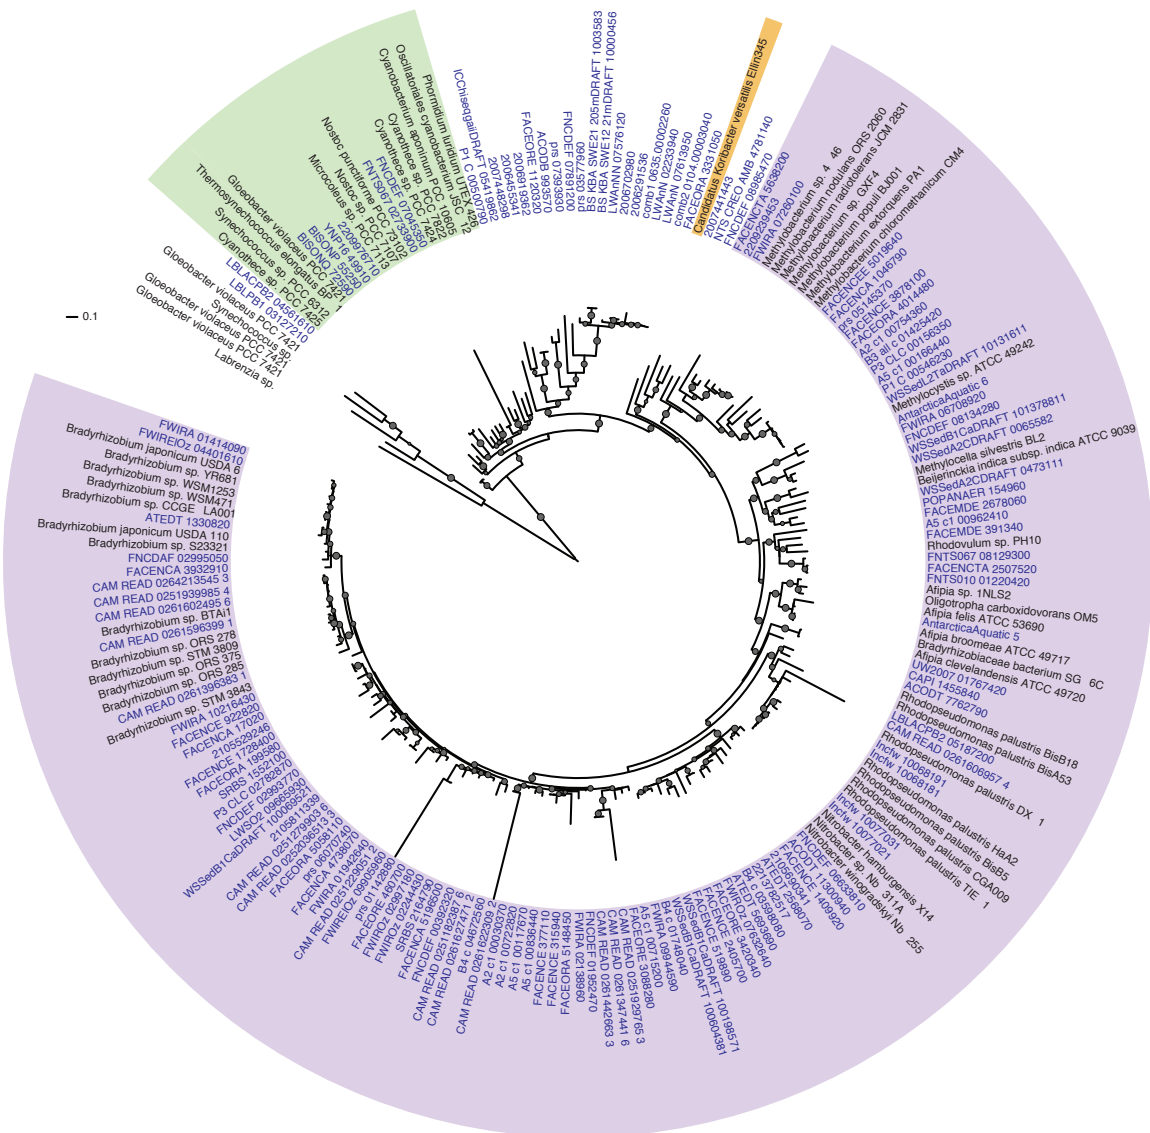

**Figure S2. Phylogeny of metagenomic HpnP sequences.** Metagenomic HpnP sequences, blue, appear in this maximum likelihood phylogeny with known HpnP sequences from genomes. Phylogeny is the same as Fig. 1. Additional information on metagenomic *hpnPs* can be found in Dataset S1. Clades are colored in purple for alphaproteobacteria, green for cyanobacteria, orange for acidobacteria, and colorless for unknown. Branch support was calculated with aLRT. Gray dots represent aLRT values over 0.8 with larger dot equaling larger aLRT values. The scale bar is a measure of evolutionary distance equaling 0.1 substitutions per site.

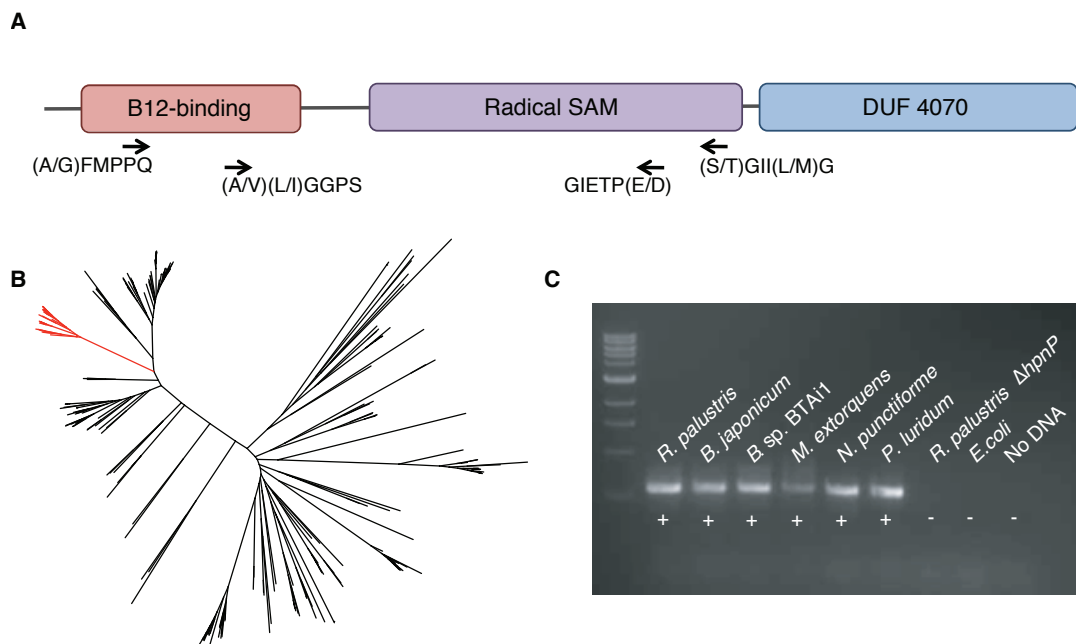

**Figure S3. Design of *hpnP* degenerate PCR primers.** (A) Protein domain structure of HpnP determined by InterProScan and location of degenerate PCR primers with corresponding protein consensus sequences. HpnP is 527 amino acids in length. The domains B<sub>12</sub> binding, radical SAM, and DUF4070 are 105, 162, and 140 amino acids in length, respectively, in *R. palustris* TIE-1. (B) Phylogeny of *hpnP*, red, and related homologous proteins. (C) Control PCR reactions for degenerate *hpnP* primers with genomic DNA from diverse cultured 2-MeBHP producers and negative controls.

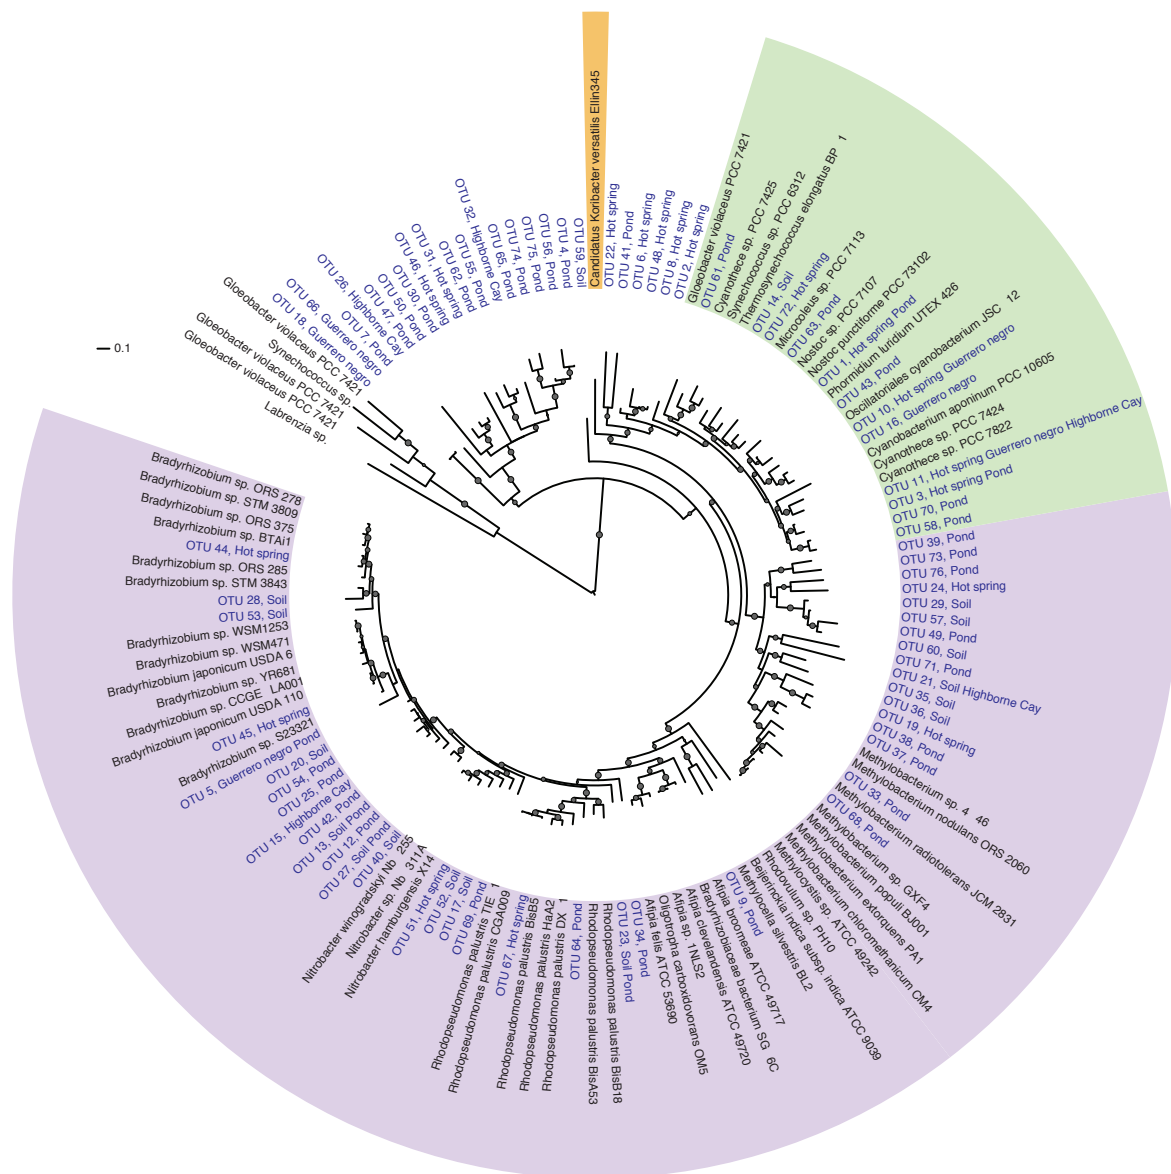

**Figure S4. Phylogenetic tree comparing PCR clone library generated *hpnP* sequences to reference *hpnP* sequences from genomes.** Environmental *hpnP* sequences were clustered at 95% similarity in CD-HIT. The representative sequences recovered were aligned in MAFFT. The phylogeny was generated in PhyML and edited in iTOL. Leaf names reflect all sequences that clustered with the representative sequence in blue. Clades are colored in purple for alphaproteobacteria, green for cyanobacteria, and orange for acidobacteria. Unknown group 1 is the early diverging uncolored region, and unknown group 2 is the uncolored region between the acidobacterium and cyanobacteria. Branch supports were calculated with aLRT. Gray dots represent aLRT values over 0.8 with larger dot equaling larger aLRT values. The scale bar is a measure of evolutionary distance equaling 0.1 substitutions per site.

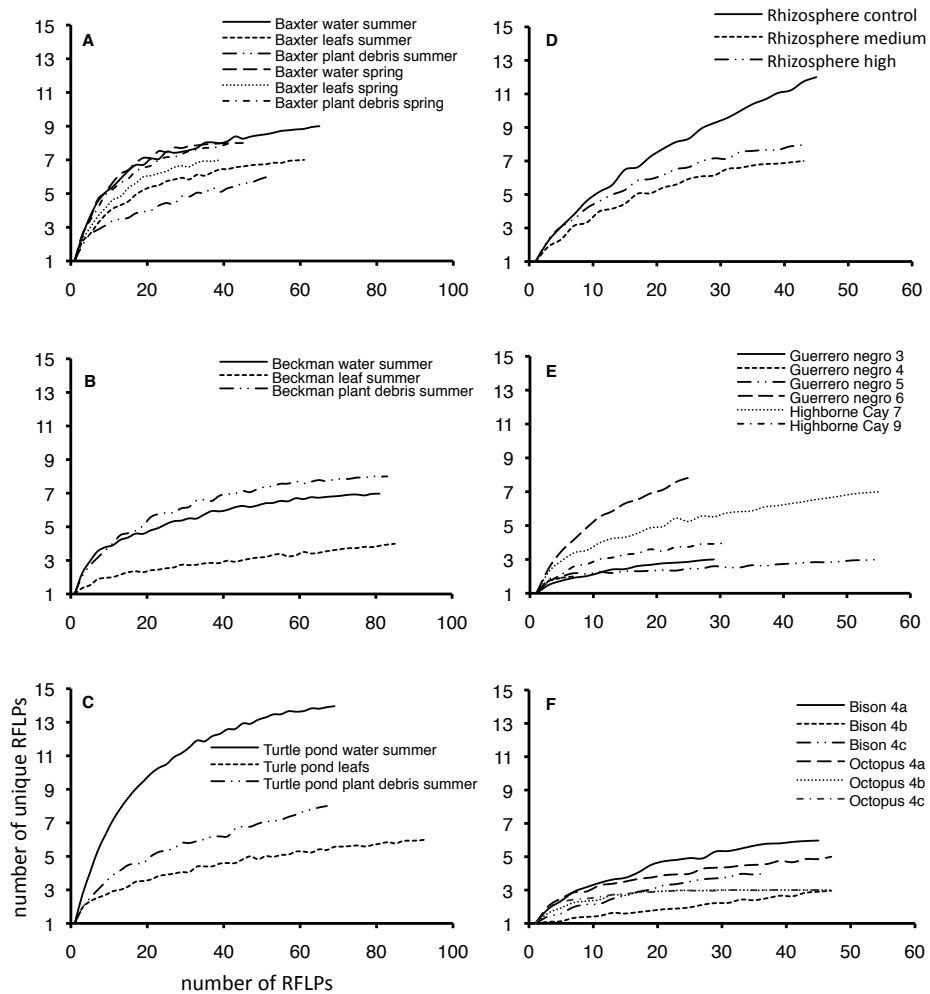

**Figure S5. Rarefaction curves for select *hpnP* clone libraries.** RFLP patterns confirmed to be *hpnP* by sequencing were used to generate rarefaction curves in QIIME using the observed species metric and rarefied 100 times in increments of 2. Rarefaction curves are grouped by environment and average richnesses ( $\pm$  standard deviation) were calculated when data was rarefied to 25 RFLP patterns **(A)** Baxter pond  $6.4 \pm 1.7$  **(B)** Beckman pond  $4.5 \pm 1.2$  **(C)** Turtle pond  $6.6 \pm 3.5$  **(D)** Rhizosphere  $7 \pm 1.2$  **(E)** Guerrero negro  $4.4 \pm 3$  and Highborne Cay  $4.5 \pm 1$  **(F)** selected hot spring microbial mats  $3.4 \pm 1$ .

**SI Table 1. Description of environmental samples that appear in Figure 2**

| Environment | Site/Sample type            | Sample Name        | Description                                                                            | Previously Published Name |
|-------------|-----------------------------|--------------------|----------------------------------------------------------------------------------------|---------------------------|
| Hot springs | Carbonate                   | Narrow Gauge 1     | Carb; floating pieces of mat from terrace pool                                         | NG09-1                    |
| Hot springs | Carbonate                   | Narrow Gauge 2     | Carb; thin orange mat from terrace edge                                                | NG09-2                    |
| Hot springs | Carbonate                   | Narrow Gauge 3     | Carb; thin orange mat from terrace overflow                                            | NG09-3                    |
| Hot springs | Carbonate                   | Narrow Gauge 5     | Carb; orange mat from runoff channel                                                   | NG09-5                    |
| Hot springs | Carbonate                   | Narrow Gauge 6     | Carb; white carbonate from spring source                                               | NG09-6                    |
| Hot springs | Carbonate                   | Narrow Gauge 7     | Carb; thin white streamers in source pool                                              | NG09-7                    |
| Hot springs | Carbonate                   | Narrow Gauge 8     | Carb; orange mat from runoff channel                                                   | NG09-8                    |
| Hot springs | Pink streamer               | Octopus Spring 1   | PS; pink streamers                                                                     | OS09-1                    |
| Hot springs | Pink streamer               | Brain Pool 1       | PS; pink streamers                                                                     | BP09-1                    |
| Hot springs | Pink streamer               | Bison Pool 1       | PS; pink streamers                                                                     | B09-1                     |
| Hot springs | Pink streamer               | Ojo Caliente 1     | PS; pink streamers                                                                     | OC09-1                    |
| Hot springs | Pink streamer               | Brain Pool 2       | PS; pink streamers with green coatings forming in mixing zone between geyser and creek | BP09-2                    |
| Hot springs | Pink streamer               | Narrow Gauge 4     | PS; white opaque streamers from source old Narrow Gauge (carbonate system)             | NG09-4                    |
| Hot springs | Pink streamer               | Spent Kleenex 1    | PS; white streamers                                                                    | SK09-1                    |
| Hot springs | Pink streamer               | Bison Pool 2       | PS; yellow streamers                                                                   | B09-2                     |
| Hot springs | Yellow biofilm              | Bison Pool 3       | YB; yellow biofilm                                                                     | B09-3                     |
| Hot springs | Yellow biofilm              | Octopus Spring 2   | YB; yellow biofilm                                                                     | OS09-2                    |
| Hot springs | Orange mat high temperature | Octopus Spring 3   | OM-HT; thick green filaments growing off of stratified orange mat                      | OS09-3                    |
| Hot springs | Orange mat high temperature | Imperial Geyser 1  | OM-HT; yellow topped stratified mat with orange and green layers below                 | IG09-1                    |
| Hot springs | Orange mat high temperature | Imperial Geyser 2a | OM-HT; <1mm thick upper orange and green layer of stratified mat                       | IG09-2a                   |
| Hot springs | Orange mat high temperature | Imperial Geyser 2b | OM-HT; bright salmon color layers in stratified mat                                    | IG09-2b                   |
| Hot springs | Orange mat high temperature | Imperial Geyser 2c | OM-HT; thick grey soft mat                                                             | IG09-2c                   |
| Hot springs | Orange mat high temperature | Imperial Geyser 3  | OM-HT; thick green filaments growing off of stratified orange mat                      | IG09-3                    |

| Environment | Site/Sample type           | Sample Name                  | Description                                                                    | Previously Published Name |
|-------------|----------------------------|------------------------------|--------------------------------------------------------------------------------|---------------------------|
| Hot springs | Orange mat low temperature | Bison Pool 4a                | OM-LT; upper orange layer from conoform orange mat                             | B09-4a                    |
| Hot springs | Orange mat low temperature | Bison Pool 4b                | OM-LT; green middle layer from conoform orange mat                             | B09-4b                    |
| Hot springs | Orange mat low temperature | Bison Pool 4c                | OM-LT; salmon colored sinter pieces at base of conoform mat                    | B09-4c                    |
| Hot springs | Orange mat low temperature | Octopus Spring 4a            | OM-LT; upper orange layer from conoform orange mat                             | OS09-4a                   |
| Hot springs | Orange mat low temperature | Octopus Spring 4b            | OM-LT; green middle layer from conoform orange mat                             | OS09-4b                   |
| Hot springs | Orange mat low temperature | Octopus Spring 4c            | OM-LT; salmon colored sinter pieces at base of conoform mat                    | OS09-4c                   |
| Hot springs | Black sediment             | Norris zygogonium mat 1      | BS; zygogonium mat                                                             | NR09-1                    |
| Hot springs | Black sediment             | Norris zygogonium mat 2      | BS; elemental sulfur colored white mat from zygogonium mat source spring       | NR09-2                    |
| Hot springs | Black sediment             | Norris zygogonium mat 3      | BS; bright green biofilm from runoff channel                                   | NR09-3                    |
| Hot springs | Black sediment             | Washburn 1                   | BS; black gelatinous sediment                                                  | WB09-1                    |
| Hot springs | Black sediment             | Washburn 2                   | BS; black sediment                                                             | WB09-2                    |
| Hot springs | Black sediment             | Boulder Spring 1             | BS; black gelatinous sediment                                                  | BS09-1                    |
| Hot springs | Black sediment             | Boulder Spring 2             | BS; black gelatinous sediment                                                  | BS09-2                    |
| Terrestrial | Soil                       | Rhizosphere, control         | Rancho Sierra Vista Newbury Park, CA<br>; Sage brush rhizosphere; 0 g N/m/yr   |                           |
| Terrestrial | Soil                       | Rhizosphere, medium nitrogen | Rancho Sierra Vista Newbury Park, CA<br>; Sage brush rhizosphere; 1.5 g N/m/yr |                           |
| Terrestrial | Soil                       | Rhizosphere, high nitrogen   | Rancho Sierra Vista Newbury Park, CA<br>; Sage brush rhizosphere; 3 g N/m/yr   |                           |
| Freshwater  | Man-made ponds             | Baxter water, summer         | Whole water                                                                    |                           |
| Freshwater  | Man-made ponds             | Baxter leafs, summer         | Lily pad leaf scrapping                                                        |                           |
| Freshwater  | Man-made ponds             | Baxter plant debris, summer  | Decaying plant matter from the bottom of the pond                              |                           |

| Environment | Site/Sample type     | Sample Name                  | Description                                                                                                                                | Previously Published Name |
|-------------|----------------------|------------------------------|--------------------------------------------------------------------------------------------------------------------------------------------|---------------------------|
| Freshwater  | Man-made ponds       | Baxter water, spring         | Whole water                                                                                                                                |                           |
| Freshwater  | Man-made ponds       | Baxter leafs, spring         | Lilypad leaf scrapping                                                                                                                     |                           |
| Freshwater  | Man-made ponds       | Baxter plant debris, spring  | Decaying plant matter from the bottom of the pond                                                                                          |                           |
| Freshwater  | Man-made ponds       | Beckman water, summer        | Whole water                                                                                                                                |                           |
| Freshwater  | Man-made ponds       | Beckman leafs, summer        | Lilypad leaf scrapping                                                                                                                     |                           |
| Freshwater  | Man-made ponds       | Beckman plant debris, summer | Decaying plant matter from the bottom of the pond                                                                                          |                           |
| Freshwater  | Man-made ponds       | Turtle pond water, summer    | Whole water                                                                                                                                |                           |
| Freshwater  | Man-made ponds       | Turtle pond leafs, summer    | Whole leaf                                                                                                                                 |                           |
| Freshwater  | Man-made ponds       | Turtle pond sediment, summer | Pond sediment in contact with plant roots                                                                                                  |                           |
| Marine      | Open water           | Whole seawater               | SPOT 121; 33°33'N, 118°24'W; Sept. 21, 2012; 2L surface water filter on GF/F Whatman                                                       |                           |
| Marine      | Open water           | Plankton tow                 | SPOT 121; 33°33'N, 118°24'W; Sept. 21, 2012; horizontal surface tow filtered on GF/F Whatman; contained pennate diatoms, e.g. Rhizosolenia |                           |
| Marine      | Hypersaline lagoon   | Laguna Guerrero Negro 1      | In situ Pond 4 near 1 (0-5mm); September 16, 2002                                                                                          |                           |
| Marine      | Hypersaline lagoon   | Guerrero negro 2             | Flume experiment Pond 4 near 5 85 ppt salinity top 0 mm, orange                                                                            |                           |
| Marine      | Hypersaline lagoon   | Guerrero negro 3             | Flume experiment Pond 4 near 5 85 ppt salinity top 1-1.5 mm                                                                                |                           |
| Marine      | Hypersaline lagoon   | Guerrero negro 4             | Flume experiment Pond 4 near 5 diel 10:45 pm 0-1 mm                                                                                        |                           |
| Marine      | Hypersaline lagoon   | Guerrero negro 5             | Flume experiment Pond 4 near 5 diel 2 pm 2-3 mm                                                                                            |                           |
| Marine      | Hypersaline lagoon   | Guerrero negro 6             | Flume experiment Pond 4 near 5 diel 2 pm 0-1 mm                                                                                            |                           |
| Marine      | Modern stromatolites | Highborne Cay 1              | Subtidal mats, windward side of Highborne Cay Bahamas (76°49'W, 24°43'N), March 2010                                                       |                           |
| Marine      | Modern stromatolites | Highborne Cay 2              | As above                                                                                                                                   |                           |
| Marine      | Modern stromatolites | Highborne Cay 3              | As above                                                                                                                                   |                           |



**SI Table 2. Hypergeometric probability of *hpnP* or *shc* correlating with plant-associated organisms or environments.**

|                          | <i>hpnP</i>           |                       | <i>shc</i>             |                       |
|--------------------------|-----------------------|-----------------------|------------------------|-----------------------|
|                          | genomes               | metagenomes           | genomes                | metagenomes           |
| # genomes or metagenomes | 1200                  | 474                   | 1200                   | 474                   |
| # plant associated       | 107                   | 93                    | 107                    | 93                    |
| # contain gene           | 26                    | 59                    | 183                    | 221                   |
| # overlap                | 12                    | 30                    | 44                     | 66                    |
| p value                  | 4.6x10 <sup>-7*</sup> | 5.7x10 <sup>-9*</sup> | 6.6x10 <sup>-12*</sup> | 1.2x10 <sup>-7*</sup> |

\*p values < 0.01 are significant.

**SI Table 3. Hypergeometric probability of *hpnP* correlating with *nifD* or *moxF*.**

|                                   | <i>nifD</i>           | <i>moxF</i>           |
|-----------------------------------|-----------------------|-----------------------|
| # genomes                         | 1200                  | 1200                  |
| # with <i>nifD</i> or <i>moxF</i> | 199                   | 124                   |
| # with <i>hpnP</i>                | 26                    | 26                    |
| # overlap                         | 16                    | 13                    |
| p value                           | 2.1x10 <sup>-7*</sup> | 2.7x10 <sup>-7*</sup> |

\*p values < 0.01 are significant.
